# Supplementary material
Source: PubMed Central journal article supplement (PMC6791375)
Supplement: NIHMS1538855-supplement-1.pdf [file NIHMS1538855-supplement-1.pdf]

<sup>797</sup> **Appendix B. Supplemental Figures**

<sup>798</sup> In this section, we show supplemental figures referenced in the main text.

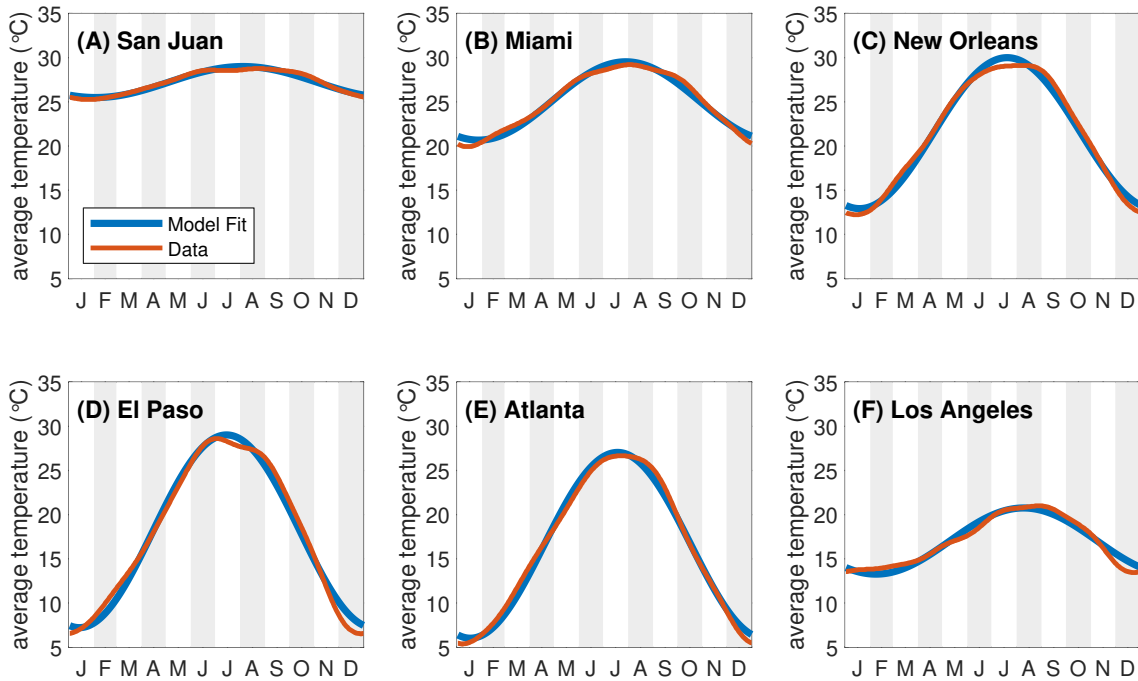

Figure B.12: Fit of Equation 1 (with  $A_2 = 0$ ) to the mean daily temperature of each of the six cities. The model fit is shown in blue while the data are shown in red.

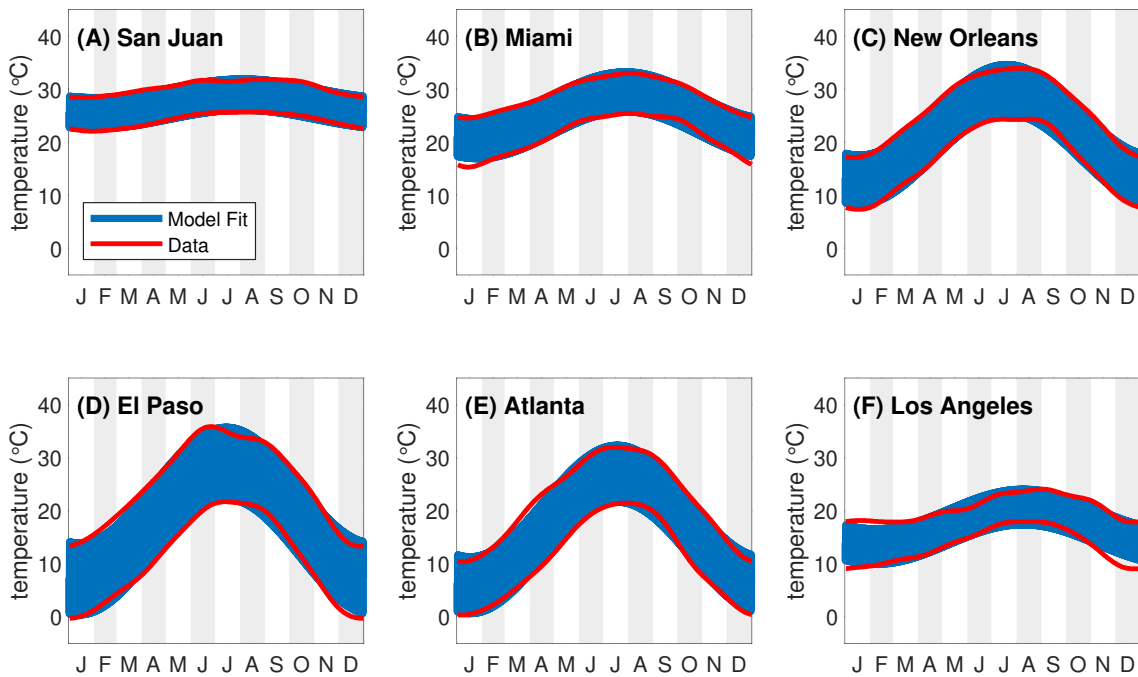

Figure B.13: Fit of Equation 1 to the mean daily temperature range of each of the six cities with diurnal temperature fluctuations. The model fit is shown in blue while the minimum and maximum temperatures from the data are shown in red.

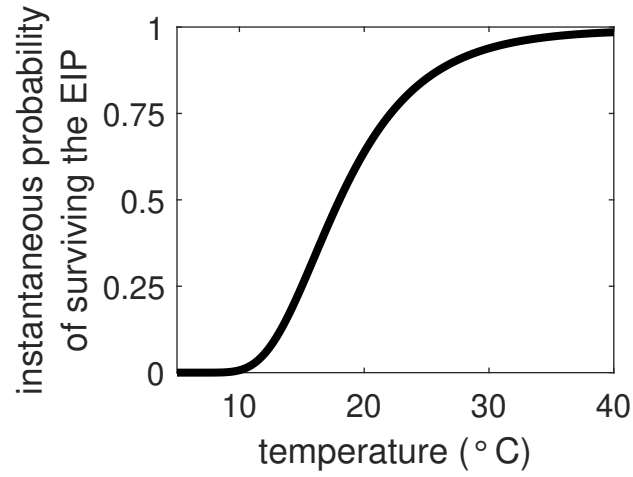

Figure B.14: The probability of surviving the EIP (Equation 5) as a function of temperature.

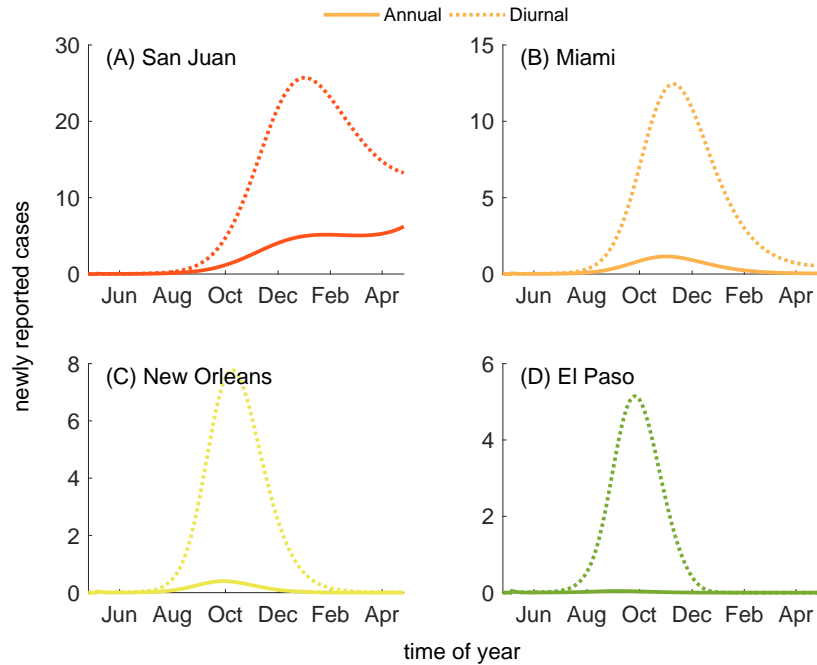

Figure B.15: Comparison of time series solutions to the model for (A) San Juan, (B) Miami, (C) New Orleans, and (D) El Paso when only seasonal variation was included and when both seasonal and diurnal variation was included. In all cities, the initial introduction occurred mid-May.

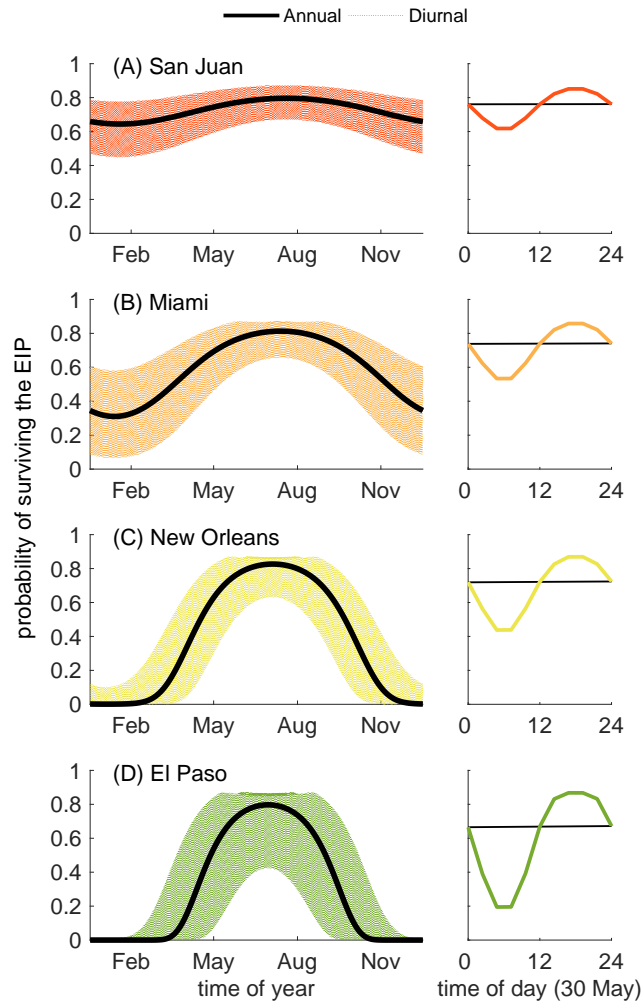

Figure B.16: Calculations of the instantaneous probability of surviving the EIP across on year for (A) San Juan, (B) Miami, (C) New Orleans, and (D) El Paso when only seasonal variation was included and when both seasonal and diurnal variation was included. The right column shows fluctuations in the probability of surviving the EIP on a single day (Day 150, May 30).
